# Supplementary material for: CAMELS-NZ: Hydrometeorological time series and landscape attributes for Aotearoa New Zealand
Source: Copernicus journal article supplement (doi:10.5194/essd-2025-244), 2025-05-26
Supplement: Supplementary file [file essd-2025-244-AC4-supplement.pdf]

Thank you very much for providing detailed comments, which allowed us to refine the manuscript and the dataset.

Please see the comments provided by the referee in black font, and our point-by-point response in blue font.

### **Community Comment #2 (Ather Abbas)**

I am the author of AquaFetch (<https://github.com/hyex-research/AquaFetch>), a Python library designed to unify open-source hydrological datasets within the Python environment. While integrating CAMELS-NZ into our package, we encountered a few issues and would greatly appreciate it if they could be addressed in a future release of the dataset:

Thank you for your thoughtful feedback and for incorporating CAMELS-NZ into the AquaFetch library. It's great to see the dataset contributing to open hydrological research. Please find our replies to your comments below (in blue font):

- The streamflow file for station 74368 is empty.

Thank you for pointing this out. The streamflow file for station 74368 is intentionally empty because access to this data requires permission. This detail, however, was missing from the README file. We have now updated the README to clearly indicate the restricted access for this station's streamflow data.

- The index/datetime format in the streamflow file for station 57521 differs from that of the other stations.

Although the datetime format appeared consistent initially, we discovered a formatting difference when inspecting the file. This has been fixed now.

- The time series files for all stations and all five features contain missing and duplicated datetime indices. This appears to be due to data missing or duplicated at the 02:00:00 timestamp on certain dates.

Thank you for your comment. This is because timestamps were in local time using New Zealand Daylight Savings. We have now updated all time series to use New Zealand Standard Time (NZST) which is UTC + 12 hours to remove this issue of missing and duplicated datetime indices.

- Adding a new attribute to the shapefile to identify the Station\_ID for each catchment polygon would be highly beneficial.

Thanks for the suggestion. We have taken this into consideration and have added Station\_ID attribute for each catchment polygon.

Thank you very much for making this dataset available to the open-source community.
